# Supplementary material for: Multicolor fluorescence activated cell sorting to generate humanized monoclonal antibody binding seven subtypes of BoNT/F
Source: PubMed Central journal article supplement (PMC9436041; doi:10.1371/journal.pone.0273512), 2022-09-01

| BoNT/F1H <sub>C</sub> |                  |                  |                  | BoNT/F7H <sub>C</sub> |                  |                  | BoNT/F2     | BoNT/F3     | BoNT/F4     | BoNT/F5     | BoNT/F6     |                          |
|-----------------------|------------------|------------------|------------------|-----------------------|------------------|------------------|-------------|-------------|-------------|-------------|-------------|--------------------------|
| Amino acids           | 28H4             | hu6F15.4         | hu6F15.6         | Amino acids           | hu6F15.4         | hu6F15.6         | Amino acids | Amino acids | Amino acids | Amino acids | Amino acids |                          |
|                       | $\Delta\Delta G$ | $\Delta\Delta G$ | $\Delta\Delta G$ |                       | $\Delta\Delta G$ | $\Delta\Delta G$ |             |             |             |             |             |                          |
| 1026R                 | >2.13            | 3.70             | 3.96             | R                     | >2.0             | 2.59             | R           | R           | R           | R           | R           | $\Delta\Delta G$ 0.2-0.5 |
| 1027L                 | >2.13            | 3.79             | 3.96             | L                     | >2.0             | >2.59            | L           | L           | L           | L           | L           | $\Delta\Delta G$ 0.5-1.0 |
| 1048G                 | >2.13            | 0.50             | 1.82             | G                     | >2.0             | 1.60             | G           | G           | G           | G           | G           |                          |
| 1045S                 | -0.12            | 0.24             | 0.07             | L*                    | 0.02             | 2.26             | S           | S           | S           | S           | S           |                          |
| 991Q                  | -0.03            | -0.01            | -0.04            | Q                     | 1.37             | 0.59             | Q           | Q           | Q           | Q           | Q           | $\Delta\Delta G$ 1.0-2.0 |
| 993T                  | 1.82             | 0.86             | 1.73             | T                     | 1.33             | 0.89             | T           | T           | T           | T           | T           |                          |
| 994A                  | 0.73             | -0.10            | 1.2              | T*                    | 0.03             | 0.64             | S           | S           | A           | S           | S           |                          |
| 996N                  | 0.87             | 0.01             | 0.53             | N                     | 0.05             | -0.11            | N           | N           | N           | N           | N           | $\Delta\Delta G$ >2.0    |
| 1025N                 | 0.31             | 0.12             | 0.62             | N                     | 0.39             | 0.14             | N           | N           | N           | N           | N           |                          |
| 995G                  | -0.21            | -0.18            | 0.06             | G                     | 0.21             | 1.40             | G           | G           | G           | G           | G           |                          |
| 1044I                 | -0.22            | -0.07            | 0.29             | I                     | 0.56             | 0.86             | I           | I           | I           | I           | I           |                          |
| 1047L                 | 0.21             | 0.03             | 0.21             | L                     | -0.50            | -0.30            | L           | L           | L           | L           | L           |                          |
| 1046N                 | 0.04             | 0.03             | 0.38             | N                     | 0.67             | 0.82             | N           | N           | N           | N           | N           |                          |
| 1051H                 | -0.10            | -0.02            | 0.22             | H                     | -0.84            | -0.21            | H           | H           | H           | H           | H           |                          |
| 1029N                 | 0.40             | -0.02            | 0.20             | H*                    | 0.17             | 0.09             | N           | N           | N           | N           | N           |                          |
| 1043S                 | 0.20             | 0.04             | 0.30             | S                     | 0.17             | 0.27             | S           | S           | S           | S           | S           |                          |
| 1048D                 | -0.18            | 0.07             | 0.10             | N*                    | 0.98             | -0.12            | D           | D           | D           | D           | D           |                          |
| 1028G                 | 0.18             | 0.01             | 0.07             | G                     | -0.33            | -0.02            | G           | G           | G           | G           | G           |                          |
| 997N                  | 0.06             | 0.04             | 0.06             | N                     | 0.45             | 0.27             | K           | K           | N           | K           | K           |                          |

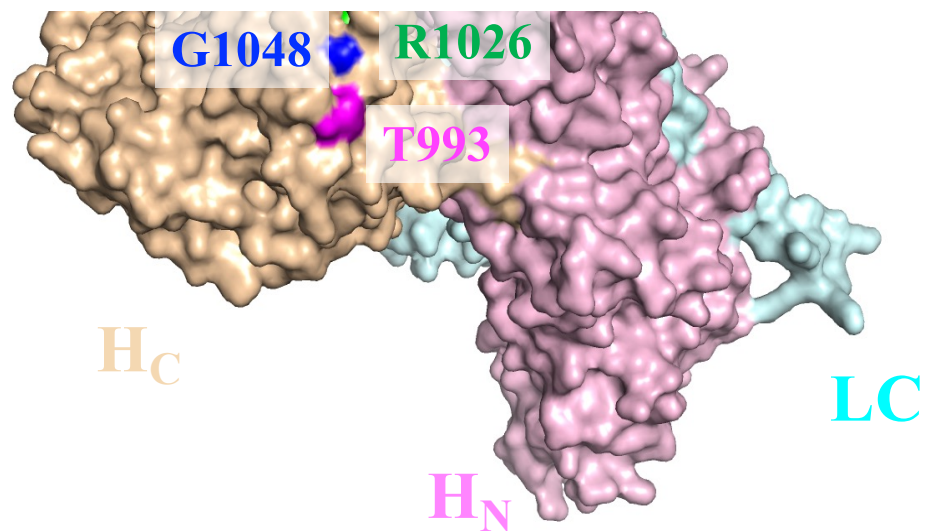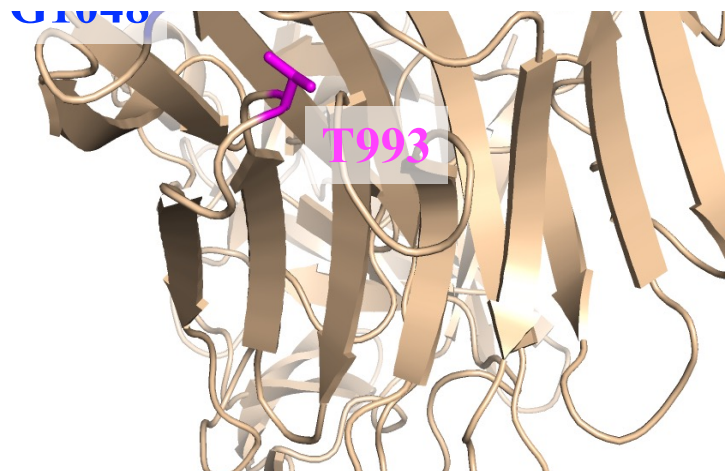

**B**

**28H4**

**Hu6F15.4**

**hu6F15.6**

Fab K<sub>D</sub> 12.46 nM  
IgG K<sub>D</sub> 3.48 nM

Fab K<sub>D</sub> 0.375 nM  
IgG K<sub>D</sub> 0.031 nM

Fab K<sub>D</sub> 0.28 nM  
IgG K<sub>D</sub> 0.302 nM

**F1H<sub>C</sub>**

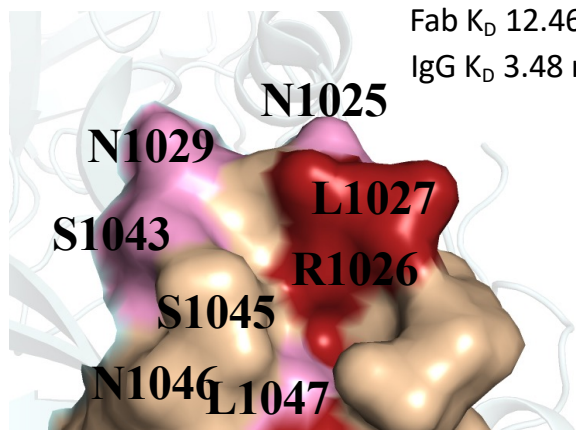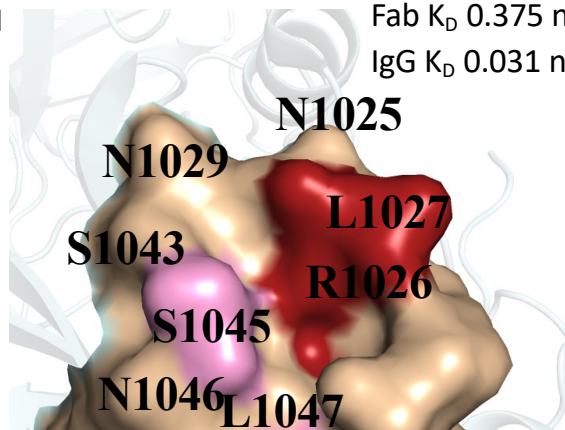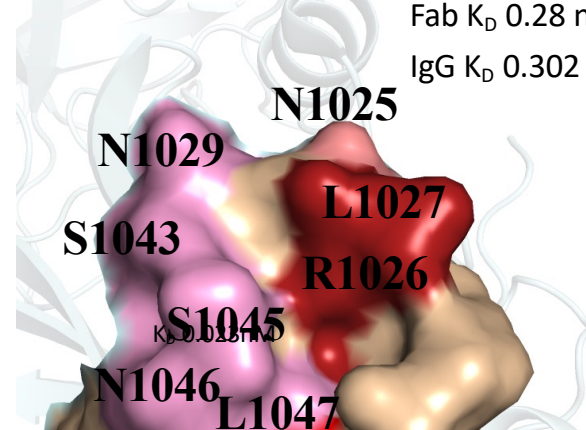

**A**

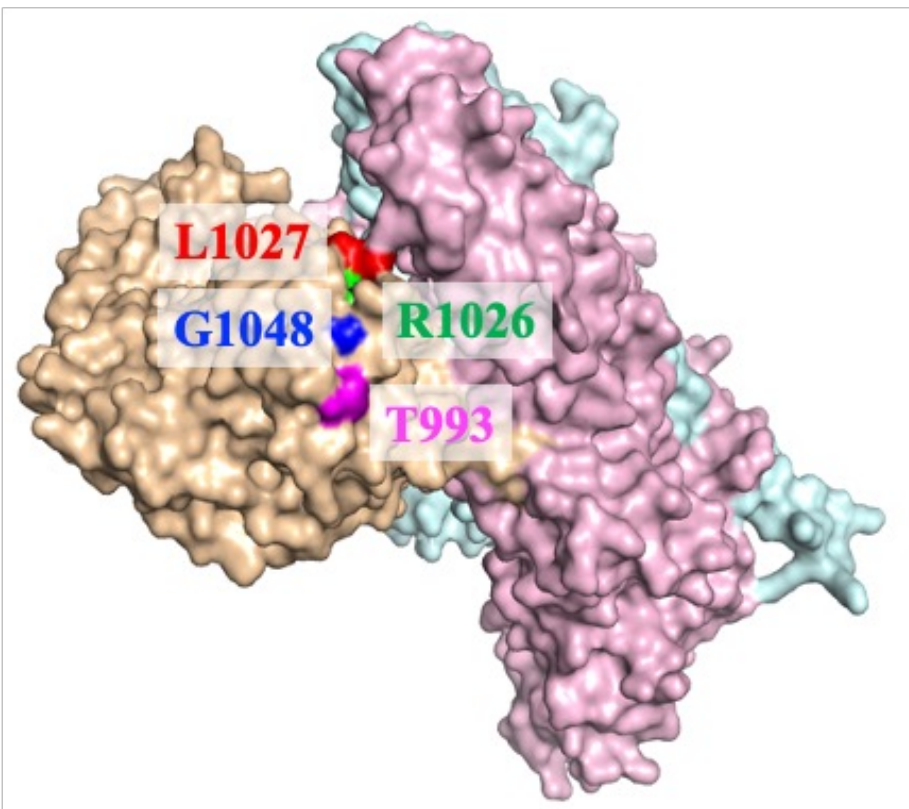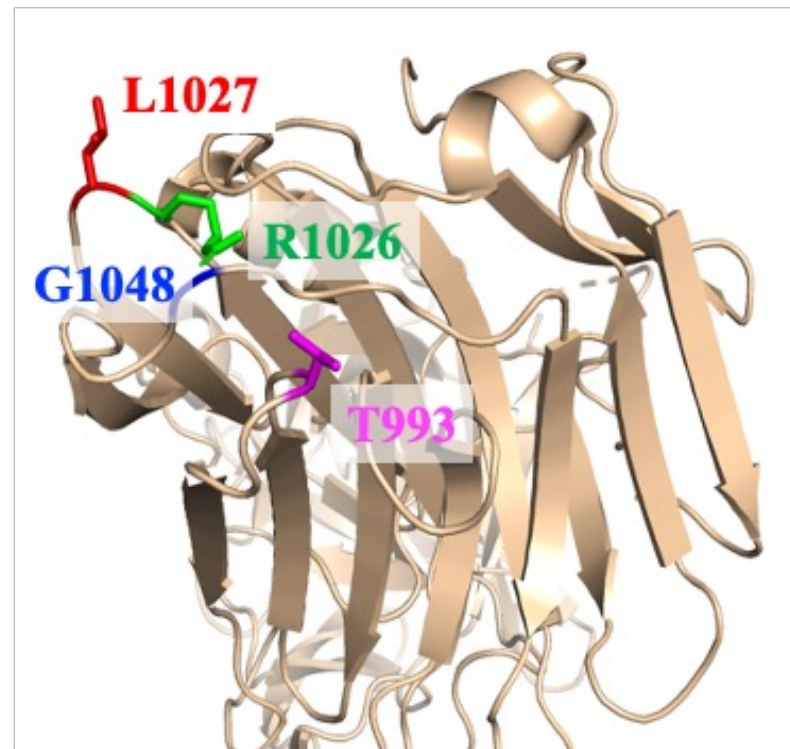

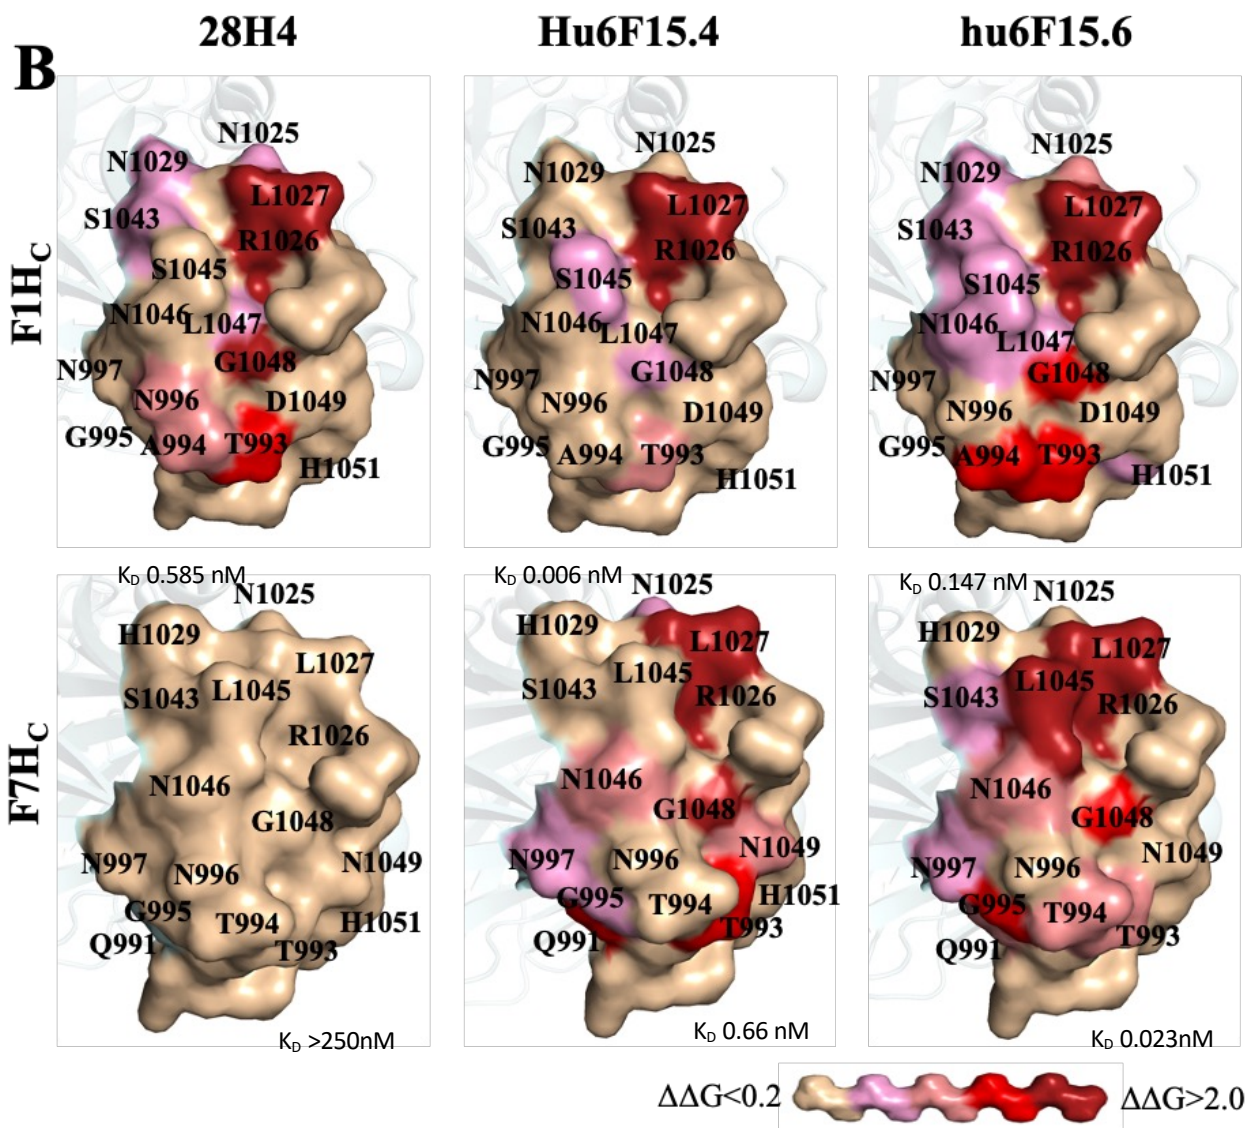

Supplement: pone.0273512.s002.pdf [file pone.0273512.s002.pdf]
