# Supplementary material for: Multicolor fluorescence activated cell sorting to generate humanized monoclonal antibody binding seven subtypes of BoNT/F
Source: PubMed Central journal article supplement (PMC9436041; doi:10.1371/journal.pone.0273512), 2022-09-01
Supplement: pone.0273512.s001.pdf [file pone.0273512.s001.pdf]

**A****BoNT/F1 domain binding**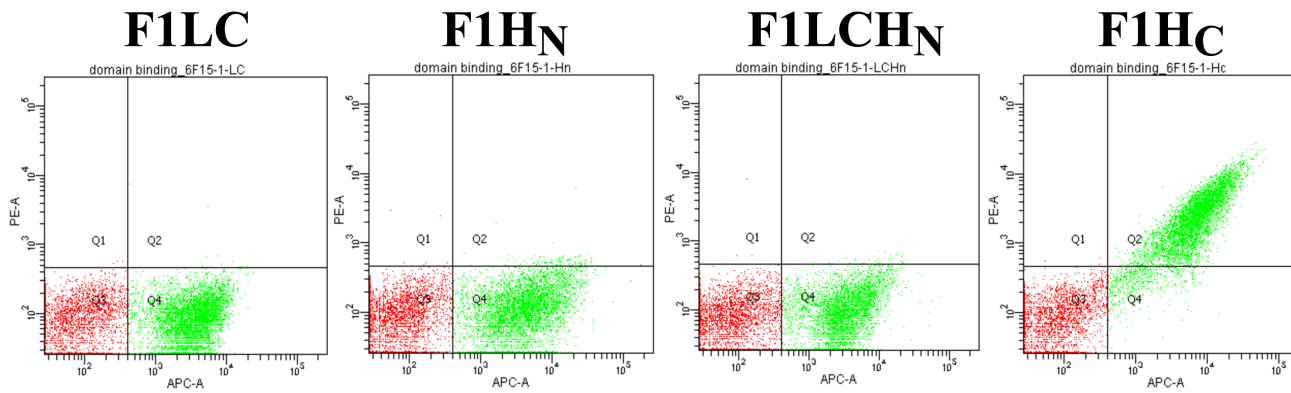**BoNT/F1 domain expression level****B****BoNT/F subtype binding**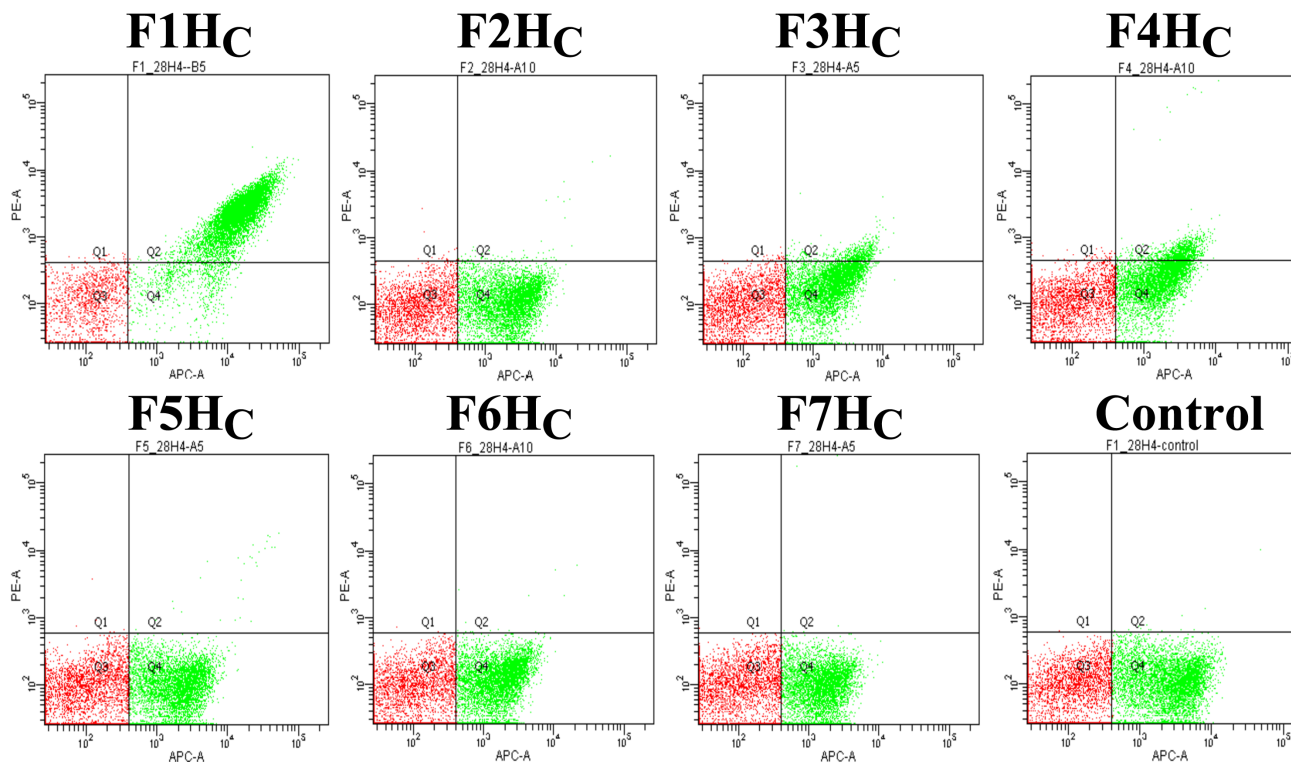**BoNT/F subtype expression level**
